# Supplementary material
Source: PubMed Central journal article supplement (PMC10440257)
Supplement: NIHMS1880027-supplement-Supplementary_Material.pdf [file NIHMS1880027-supplement-Supplementary_Material.pdf]

Supplementary Material for manuscript:

Multimodal Hypersensitivity Derived from Quantitative Sensory Testing Predicts Pelvic Pain

Outcome: an Observational Cohort Study

Matthew J. Kmicik<sup>\*1,2</sup>, Frank F. Tu<sup>1,2</sup>, Daniel J. Clauw<sup>3</sup>, and Kevin M. Hellman<sup>1,2</sup>

<sup>1</sup>Department of Ob/Gyn, NorthShore University HealthSystem, Evanston, IL, United States

<sup>2</sup>Department of Ob/Gyn, Pritzker School of Medicine, University of Chicago, Chicago, IL, United States

<sup>3</sup>Departments of Anesthesiology, Medicine, and Psychiatry, Chronic Pain and Fatigue Research Center, The University of Michigan Medical School, Ann Arbor, MI, United States

\* Corresponding author:

Matthew J. Kmicik, PhD (mkmiecik14@gmail.com)

2650 Ridge Ave.

Walgreens Building Suite 1507

Evanston, IL 60201

Content begins on the next page. Supplementary figures and tables that were referenced in the main text are labeled with the prefix **Figure S** and *Table S*, respectively. Figures and Tables referenced only in the supplementary materials will be referenced as **Figure 0.** and *Table 0.*, respectively.

### Annual Questionnaire Attrition was Approximately Random

A common concern among longitudinal designs is the impact of attrition on study conclusions. Given our >50% attrition rate across four years of annual questionnaires (Baseline  $n=200$ ; Year 1  $n=143$ ; Year 2  $n=129$ , Year 3  $n=97$ , Year 4  $n=87$ ), we evaluated potential loss to follow up effects in several different ways. First, a chi-square test of independence determined that loss to follow-up did not depend on recruited participant groups (i.e., dysmenorrhea, pain-free controls, chronic pain, bladder pain syndrome),  $\chi^2(16) = 4.58, p = .998$ . Second, we found that baseline pelvic pain did not differ between participants who submitted a year 4 questionnaire ( $M = 14.72, SD = 14.7$ ) versus those that dropped out of the study ( $M = 16.28, SD = 18.8$ ),  $t(198) = .60, p = .55$ . Third, we tested whether baseline sensory testing composites and PCs differed depending on the years of annual data submitted (see Figure 0.1). We computed six one-way between-subject analysis of variance (ANOVAs)—one ANOVA for each dependent variable/ measure (i.e., QST, Bladder Test, Audio/Visual, PC1 (*MMH*), PC2 (*PPT S-R*), PC3 (*bladder hypersensitivity*)—as a function of five participant groups that were separated based on the number of years of submitted annual data (i.e., complete data; 0; 1; 2; 3 years). All ANOVAs were not significant except for PC3 *bladder hypersensitivity* (see Table 0.1). We performed *post hoc* follow up testing using pairwise Tukey honest significant difference tests; however, none of these pairwise tests were significant after correction (see Table 0.2.). Together, these analyses suggest that longitudinal data were missing at random and did not selectively depend on recruited participant groups, pelvic pain outcome, nor predictor variables of interest calculated either via sensory testing composites or PCA.

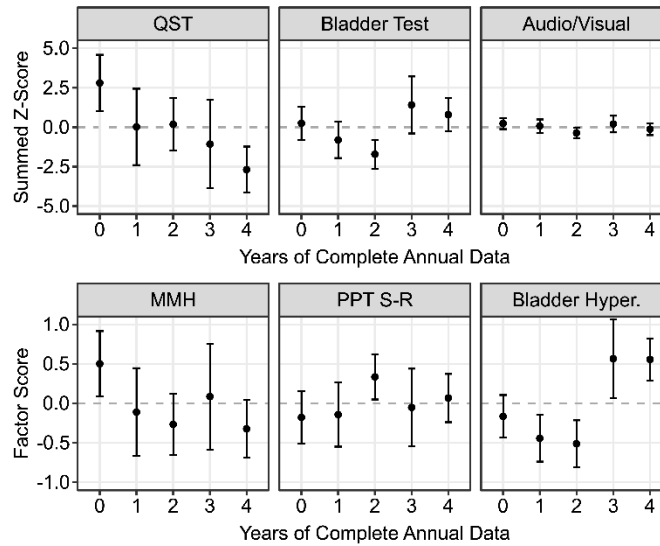

**Figure 0.1. Predictor variables derived from baseline testing remain stable across annual questionnaire.** Scores were generated for all participants over time to evaluate the impact of loss follow up. Mean summated Z-scores and factor scores for each predictor variable are plotted for each group of participants that completed 0 to 4 (complete data) years of annual questionnaires. Error bars are standard error of the mean.

*Table 0.1. One-way Analysis of Variance Results of Longitudinal Attrition Across Predictor Variables.*

| Predictor Variable             | Term                 | <i>df</i> | <i>SS</i> | <i>MS</i> | <i>F</i> | <i>p</i> |
|--------------------------------|----------------------|-----------|-----------|-----------|----------|----------|
| QST                            | Years of Annual Data | 4         | 865       | 216       | 1.47     | .21      |
|                                | Residuals            | 195       | 28717     | 147       |          |          |
| Bladder Test                   | Years of Annual Data | 4         | 206       | 51        | 0.97     | .43      |
|                                | Residuals            | 195       | 10391     | 53        |          |          |
| Audio/Visual                   | Years of Annual Data | 4         | 10        | 2         | 0.39     | .82      |
|                                | Residuals            | 195       | 1236      | 6         |          |          |
| PC1 (MMH)                      | Years of Annual Data | 4         | 23        | 6         | 0.70     | .60      |
|                                | Residuals            | 195       | 1616      | 8         |          |          |
| PC2 (PPT S-R)                  | Years of Annual Data | 4         | 7         | 2         | 0.34     | .85      |
|                                | Residuals            | 195       | 983       | 5         |          |          |
| PC3 (Bladder Hypersensitivity) | Years of Annual Data | 4         | 41        | 10        | 2.67     | .03      |
|                                | Residuals            | 195       | 741       | 4         |          |          |

*Note.* MMH=multimodal hypersensitivity; QST=quantitative sensory testing; PC=principal component; PPT S-R=pressure point threshold stimulus-response

*Table 0.2. One-way Analysis of Variance Results of Longitudinal Attrition for PC3 Bladder Hypersensitivity: Post-Hoc Follow Up Tukey Testing.*

| Predictor Variable             | Comparisons (Year-to-Year) | Mean Difference | 95% CI    |           | <i>p</i> |
|--------------------------------|----------------------------|-----------------|-----------|-----------|----------|
|                                |                            |                 | <i>LL</i> | <i>UL</i> |          |
| PC3 (Bladder Hypersensitivity) | 1-0                        | -0.28           | -1.46     | 0.91      | .97      |
|                                | 2-0                        | -0.35           | -1.49     | 0.80      | .92      |
|                                | 3-0                        | 0.73            | -0.64     | 2.10      | .59      |
|                                | 4-0                        | 0.72            | -0.30     | 1.74      | .30      |
|                                | 2-1                        | -0.07           | -1.37     | 1.24      | 1.00     |
|                                | 3-1                        | 1.01            | -0.50     | 2.52      | .35      |
|                                | 4-1                        | 1.00            | -0.20     | 2.19      | .15      |
|                                | 3-2                        | 1.08            | -0.40     | 2.55      | .26      |
|                                | 4-2                        | 1.07            | -0.09     | 2.22      | .09      |
|                                | 4-3                        | -0.01           | -1.39     | 1.37      | 1.00     |

*Note.* PC=principal component; CI=confidence interval; LL=lower level; UL=upper level.

Table S1. Descriptive Statistics of Pelvic Pain Outcome

|                       | Year        |             |             |            |            |
|-----------------------|-------------|-------------|-------------|------------|------------|
|                       | Baseline    | 1           | 2           | 3          | 4          |
| <i>Mean</i>           | 15.6        | 15.5        | 13.5        | 12.4       | 11.0       |
| <i>SD</i>             | 18.3        | 17.8        | 15.1        | 14.9       | 12.6       |
| <i>95% CI [LL UL]</i> | [13.1 18.1] | [12.6 18.5] | [10.9 16.1] | [9.4 15.3] | [8.3 13.6] |
| <i>Min - Max</i>      | 0 - 77      | 0 - 95      | 0 - 68      | 0 - 72     | 0 - 54     |
| <i>Median</i>         | 7.8         | 9.3         | 8.0         | 7.0        | 5.7        |
| <i>SEM</i>            | 1.3         | 1.5         | 1.3         | 1.5        | 1.4        |
| <i>n</i>              | 200         | 143         | 129         | 97         | 87         |

*Note.* CI=confidence interval; LL=lower level; UL=upper level

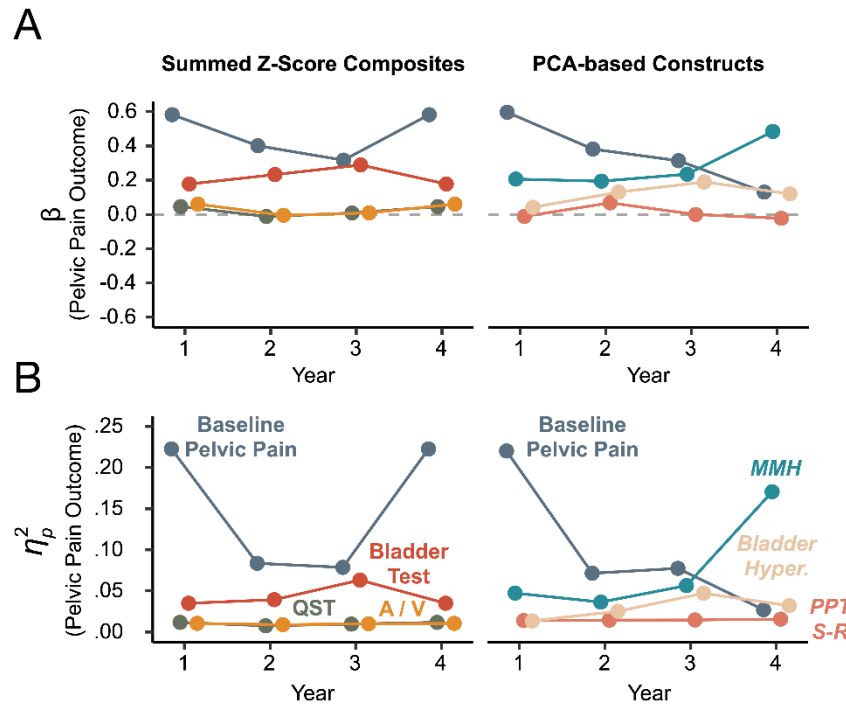

**Figure S1. Adjusting for population prevalence rates replicated the observed sample-wise regression results across the sensory composite and PCA models.** A) Standardized regression coefficients ( $\beta$ 's) are plotted across the collected annual questionnaire period for both the summed Z-score composites (left) and the PCA-based constructs (right). All  $\beta$  values are approximately zero or positive, indicating in general that increased sensitivity resulted in worse pelvic pain outcome. See B for colored labels denoting predictor variables. B) Unique explained variance ( $\eta_p^2$ ) in pelvic pain outcome as a function of each predictor is plotted across the collected annual questionnaire period for both the summed Z-score composites (left) and the PCA-based constructs (right). When comparing to the unadjusted regression results, the pattern of change over time is similar, especially in the case of the PCA-based constructs. Namely, MMH increases in predictive strength of pelvic pain outcome over time, while the opposite trend is observed with baseline pelvic pain. *Italicized text labels refer to principal components; A/V = Audio/Visual.*

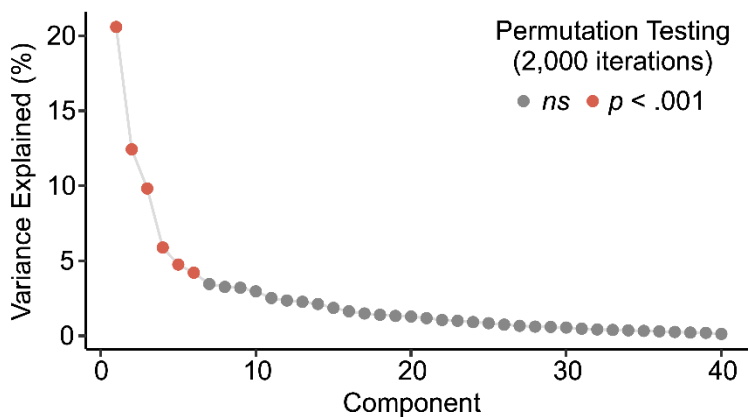

**Figure S2. Scree plot supports the first three principal components as significant components that explain total variance.** The first three components explain 43% of the variability in multimodal sensory testing. Although components four, five, and six were significant via permutation testing, their geometric factor score plots were not interpretable and likely represented non-meaningful variation. Therefore, we chose to focus on the first three components that we interpreted as representing multimodal hypersensitivity (MMH), pressure pain threshold stimulus-response function (PPT-SR), and bladder pain hypersensitivity, respectively.

*Table S2. Principal Component Eigenvalues and Explained Variances Obtained from CRAMPP Multimodal Sensory Testing Data Matrix.*

| PC | Eigenvalue | Variance (%) | Cumulated (%) | PC | Eigenvalue | Variance (%) | Cumulated (%) |
|----|------------|--------------|---------------|----|------------|--------------|---------------|
| 1* | 1639       | 20.6         | 21            | 21 | 93         | 1.2          | 90            |
| 2* | 990        | 12.4         | 33            | 22 | 84         | 1.1          | 91            |
| 3* | 782        | 9.8          | 43            | 23 | 80         | 1.0          | 92            |
| 4* | 468        | 5.9          | 49            | 24 | 73         | 0.9          | 93            |
| 5* | 378        | 4.8          | 53            | 25 | 67         | 0.8          | 94            |
| 6* | 335        | 4.2          | 58            | 26 | 59         | 0.7          | 95            |
| 7  | 275        | 3.4          | 61            | 27 | 53         | 0.7          | 95            |
| 8  | 259        | 3.3          | 64            | 28 | 49         | 0.6          | 96            |
| 9  | 255        | 3.2          | 68            | 29 | 47         | 0.6          | 96            |
| 10 | 236        | 3.0          | 71            | 30 | 44         | 0.5          | 97            |
| 11 | 200        | 2.5          | 73            | 31 | 38         | 0.5          | 97            |
| 12 | 187        | 2.4          | 75            | 32 | 34         | 0.4          | 98            |
| 13 | 180        | 2.3          | 78            | 33 | 31         | 0.4          | 98            |
| 14 | 169        | 2.1          | 80            | 34 | 29         | 0.4          | 99            |
| 15 | 148        | 1.9          | 82            | 35 | 26         | 0.3          | 99            |
| 16 | 130        | 1.6          | 83            | 36 | 24         | 0.3          | 99            |
| 17 | 118        | 1.5          | 85            | 37 | 20         | 0.3          | 99            |
| 18 | 112        | 1.4          | 86            | 38 | 17         | 0.2          | 100           |
| 19 | 105        | 1.3          | 88            | 39 | 16         | 0.2          | 100           |
| 20 | 102        | 1.3          | 89            | 40 | 10         | 0.1          | 100           |

*Note.* PC=principal component; \*indicates  $p=.005$  for 2,000 permutation iterations.



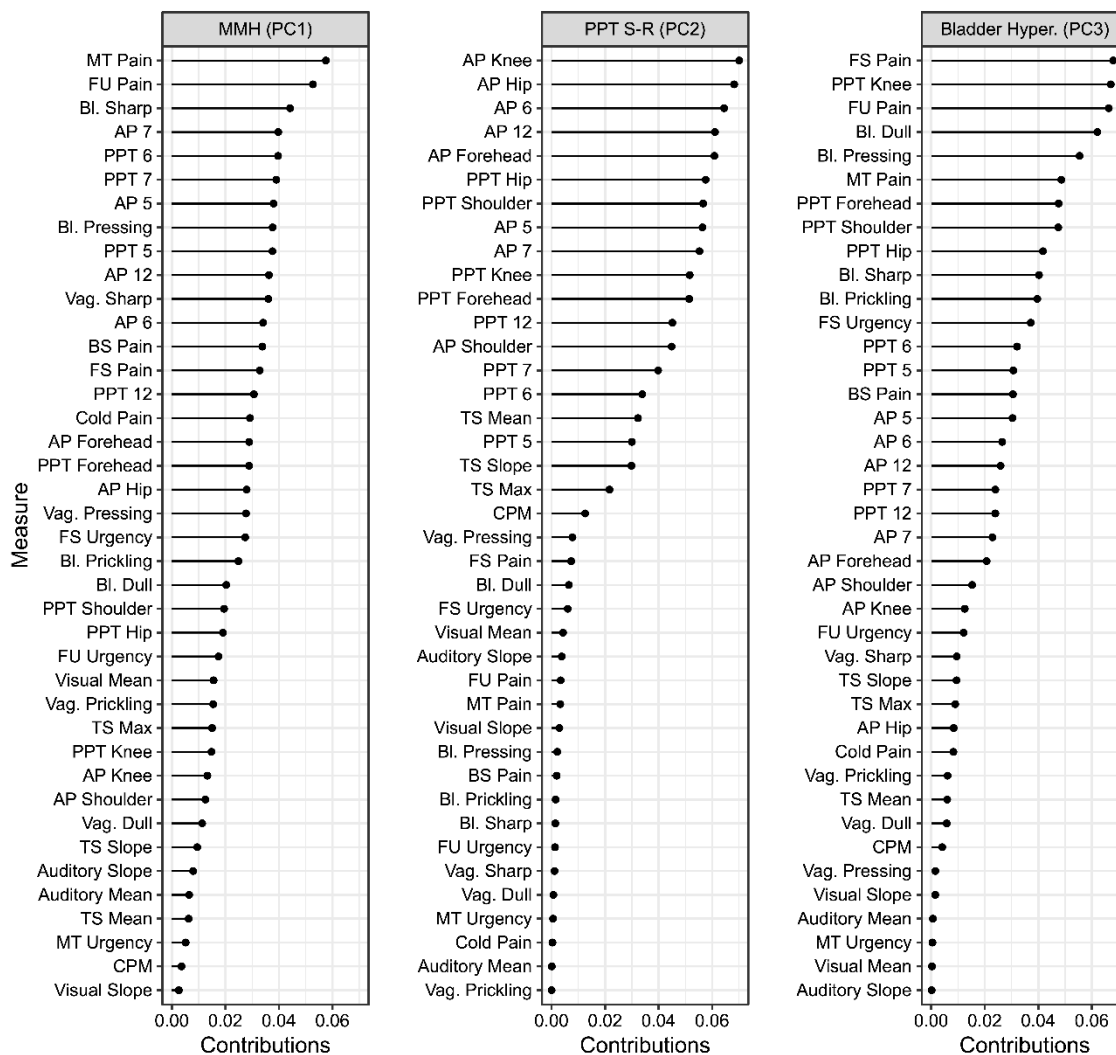

**Figure S3. Sensory testing measure contributions across the first three principal components.** Greater values indicate a greater contribution/importance of that measure to a component. BS=baseline; FS=first sensation; FU=first urge; MT=max. tolerance; PPT=pressure pain threshold; TS=temporal summation; AP=after-pain; CPM=conditioned pain modulation; Bl.=bladder; Vag.=Vaginal; numbers denote clock face positions (e.g., 6=6 o'clock).



Table S3. Descriptive Statistics of Self-Report Measures.

| Measure                           | Mean | SD   | Min | Max | n   |
|-----------------------------------|------|------|-----|-----|-----|
| <b>PROMIS</b>                     |      |      |     |     |     |
| Pain Interference                 | 11.0 | 5.7  | 6   | 29  | 200 |
| Pain Behavior                     | 18.3 | 7.7  | 7   | 35  | 200 |
| Depression                        | 15.6 | 6.7  | 8   | 37  | 200 |
| Anxiety                           | 17.2 | 6.0  | 7   | 35  | 200 |
| <b>Menstrual Pain (0-100 VAS)</b> |      |      |     |     |     |
| Without NSAIDs                    | 64.8 | 25.8 | 0   | 100 | 194 |
| <b>Interstitial Cystitis</b>      |      |      |     |     |     |
| Symptom Index (ICSI)              | 5.7  | 4.1  | 0   | 18  | 200 |
| Problem Index (ICPI)              | 3.5  | 3.8  | 0   | 15  | 200 |
| <b>GUPI</b>                       |      |      |     |     |     |
| Urinary                           | 3.5  | 2.7  | 0   | 10  | 200 |
| Quality of Life                   | 2.9  | 2.9  | 0   | 12  | 200 |
| Pain                              | 5.2  | 5.2  | 0   | 20  | 200 |
| Total                             | 11.6 | 9.6  | 0   | 41  | 200 |
| <b>CMSI (for 3 months)</b>        |      |      |     |     |     |
| During the last year              | 5.7  | 6.8  | 0   | 30  | 192 |
| During your lifetime              | 5.0  | 6.7  | 0   | 34  | 192 |
| <b>Global Mental Health</b>       | 3.7  | 0.9  | 1   | 5   | 199 |
| <b>Global Physical Health</b>     | 3.4  | 0.9  | 1   | 5   | 199 |
| <b>BSI (Somatic Symptoms)</b>     | 3.1  | 3.4  | 0   | 21  | 200 |
| <b>GSS Brief</b>                  | 1.2  | 1.6  | 0   | 8   | 192 |

*Note.* Global mental/physical health have opposite directionality (i.e., increased score denotes better health); PROMIS scores are raw short form scores; PROMIS=Patient Reported Outcomes Measurement Information System; NSAIDs=Non-Steroidal Anti-Inflammatory Drugs; GUPI=Genitourinary Pain Index; CMSI=Complex Medical Symptoms Inventory; BSI=Brief Symptom Inventory; GSS=Generalized Sensory Sensitivity.

Table S4. Regression Models of Pelvic Pain Outcome Including the GSS Brief.

| Year | Parameter            | <i>b</i> | <i>SE</i> | <i>B</i> | $\eta_p^2$ | <i>SS</i> | <i>MSE</i> | <i>F</i> | <i>p</i> |
|------|----------------------|----------|-----------|----------|------------|-----------|------------|----------|----------|
| 1    | Intercept            | 16.3     | 1.2       |          | .58        | 36427     | 197        | 185.1    | < .001   |
|      | Baseline Pelvic Pain | 0.5      | 0.1       | 0.53     | .23        | 7718      |            | 39.2     | < .001   |
|      | GSS Brief            | -0.4     | 0.8       | -0.04    | .002       | 43        |            | 0.2      | .64      |
|      | MMH                  | 1.2      | 0.5       | 0.18     | .04        | 983       |            | 5.0      | .03      |
| 2    | Intercept            | 14.2     | 1.3       |          | .52        | 24346     | 189        | 128.7    | < .001   |
|      | Baseline Pelvic Pain | 0.3      | 0.1       | 0.30     | .06        | 1557      |            | 8.2      | .005     |
|      | GSS Brief            | -0.3     | 0.9       | -0.04    | .001       | 28        |            | 0.1      | .70      |
|      | MMH                  | 1.5      | 0.6       | 0.26     | .06        | 1423      |            | 7.5      | .01      |
| 3    | Intercept            | 13.4     | 1.4       |          | .52        | 16201     | 167        | 96.9     | < .001   |
|      | Baseline Pelvic Pain | 0.2      | 0.1       | 0.25     | .04        | 698       |            | 4.2      | .04      |
|      | GSS Brief            | 1.1      | 1.0       | 0.11     | .01        | 180       |            | 1.1      | .30      |
|      | MMH                  | 1.6      | 0.6       | 0.31     | .09        | 1382      |            | 8.3      | .01      |
| 4    | Intercept            | 11.9     | 1.3       |          | .53        | 11473     | 129        | 88.8     | < .001   |
|      | Baseline Pelvic Pain | 0.04     | 0.1       | 0.05     | .002       | 21        |            | 0.2      | .69      |
|      | GSS Brief            | 0.7      | 1.0       | 0.09     | .01        | 75        |            | 0.6      | .45      |
|      | MMH                  | 1.9      | 0.5       | 0.41     | .13        | 1567      |            | 12.1     | .001     |

Note. The *df* for each model were: Year 1 (1, 134), Year 2 (1, 119), Year 3 (1, 89), Year 4 (1, 80). MMH=multimodal hypersensitivity; GSS=generalized sensory sensitivity
